# Supplementary material for: Transcriptome Analysis by RNA Sequencing of Mouse Embryonic Stem Cells Stocked on International Space Station for 1584 Days in Frozen State after Culture on the Ground
Source: Int J Mol Sci. 2024 Mar 14;25(6):3283. doi: 10.3390/ijms25063283 (PMC10970647; doi:10.3390/ijms25063283)
Supplement: Supplementary file 1 [file ijms-25-03283-s001.zip › Morita Supplementary Excel data-S1.xlsx]

## Sheet: Sheet1
	WT_GC_0h - OSC_004_01 (GE) - Normalized expression values	WT_GC_2h - OSC_004_05 (GE) - Normalized expression values	WT_GC_8h - OSC_004_09 (GE) - Normalized expression values		WT_ISS_0h - OSC_004_02 (GE) - Normalized expression values	WT_ISS_2h - OSC_004_06 (GE) - Normalized expression values	WT_ISS_8h - OSC_004_10 (GE) - Normalized expression values		mt_GC_0h - OSC_004_03 (GE) - Normalized expression values	mt_GC_2h - OSC_004_07 (GE) - Normalized expression values	mt_GC_8h - OSC_004_11 (GE) - Normalized expression values		mt_ISS_0h - OSC_004_04 (GE) - Normalized expression values	mt_ISS_2h - OSC_004_08 (GE) - Normalized expression values	mt_ISS_8h - OSC_004_12 (GE) - Normalized expression values
ES cells	C57Bl6/129Sv ES cells				C57Bl6/129Sv ES cells				C57Bl6/129Sv ES cells				C57Bl6/129Sv ES cells
Histone H2AX genotype	H2AX (+/+)				H2AX (+/+)				H2AX (-/-)				H2AX (-/-)
Radiation condition	BU (Ground Control)				ISS (in Space)				BU (Ground Control)				ISS (in Space)
Culture time	0h	2h	8h		0h	2h	8h		0h	2h	8h		0h	2h	8h
Figure 7 Homologous Recombination
Rbbp8 (Ctip)	2.46686	2.07951	5.20691		1.74856	4.66694	5.00959		2.08353	5.21801	5.33738		2.30756	4.41527	5.03024
Topbp1	9.65136	9.14864	15.208		10.3144	14.7006	15.0562		10.7294	14.3228	14.9677		11.1341	14.4575	14.6192
Blm	5.17967	5.74802	7.39229		5.39801	8.90987	6.86379		5.20239	8.50816	7.00379		5.37539	8.81003	6.95421
Rad50	3.92168	2.80022	8.21064		3.43614	6.89985	8.82128		3.96126	6.22634	7.90093		4.21176	6.23596	8.44668
Mre11a	5.15555	5.08074	5.66646		5.40974	5.92671	5.59945		4.91376	5.60125	4.45222		5.038	5.68654	4.67583
Nbn(Nbs)	3.01656	3.17761	6.10244		3.01656	6.04572	5.8204		2.31319	5.89776	5.71938		2.78009	5.47003	4.99915
Rad51	8.35912	8.29075	5.85791		8.25142	8.59711	6.0734		7.94451	8.02155	5.79544		8.27864	7.9106	5.61331
Rad51ap1	2.61988	4.80741	2.25974		2.96316	4.75478	2.36073		2.36212	3.38432	1.90679		2.54329	3.83054	2.19035
Rad51b	1.05211	0.716264	0.875529		1.46041	1.19691	1.78197		1.34336	1.45023	1.12972		1.4743	0.978036	1.33427
Rad51c	1.42368	2.04722	1.34077		2.20316	1.29625	1.39676		2.11191	1.49503	1.18766		1.75666	1.09137	1.17149
Rad51d	3.66112	2.62945	1.74297		3.00716	1.81438	2.15267		2.82815	1.38681	2.43404		3.16626	2.24172	1.82384
Rad52	1.79669	2.80556	2.52752		1.93124	2.87351	2.5198		1.65084	3.15185	2.80797		1.6602	2.64057	2.52511
Rad54b	3.5151	2.77194	2.2849		3.39002	3.56365	3.08803		2.64528	2.90874	3.03499		2.54996	3.2101	3.09808
Rad54l	5.81459	4.29464	4.4418		5.87834	4.84988	4.37889		5.49091	4.38665	3.98834		5.34099	4.45535	4.41527
Rad54l2	8.65981	8.70894	8.92841		8.92236	8.34347	8.32122		9.06822	9.59239	8.6469		9.78859	9.94079	9.19978
Xrcc2	2.51726	4.5975	3.15722		3.2673	4.66036	3.36702		2.61315	4.16859	3.17572		3.3144	4.214	2.83526
Xrcc3	3.25061	4.1524	3.61534		3.20907	3.48035	4.10316		2.76297	3.52517	3.4559		3.31087	3.49802	3.5942
Pold1	28.6037	22.0522	18.7403		26.2462	19.2079	16.8449		15.8141	11.7814	12.3426		16.0833	12.9094	13.8145
Rpa1	29.2956	30.3247	20.809		31.0528	28.5009	20.3585		26.1167	26.8088	21.5532		25.5685	27.2949	20.8778
Figure 8
Non Homologous Recombination
Xrcc6 (Ku70)	10.6965	9.01873	5.74868		10.964	8.62865	5.7583		8.44494	6.48064	5.07901		8.51103	6.15154	4.91059
Xrcc5(Ku80)	21.4488	19.6522	15.9031		22.7344	21.9808	20.7405		25.4022	23.2983	24.2983		23.0289	23.6263	22.035
Dclre1a (Artemis)	1.46041	1.49341	2.16127		1.85296	1.38788	2.46034		1.59315	1.65529	1.97075		1.71745	1.53937	1.94694
Dclre1b (Artemis)	0.843213	1.26784	0.823901		0.868081	0.969385	0.759059		0.887861	1.3197	0.91076		0.778603	1.28851	0.734377
Dclre1c (Artemis)	0.415762	0.992956	0.953597		0.492401	1.26821	1.07769		0.453457	1.19836	1.04407		0.444776	1.02733	1.02555
Prkdc (DNA-PKcs)	2.08132	1.36563	2.62818		1.99676	3.74403	3.31167		2.56608	3.63499	3.48859		2.41474	3.63918	3.76727
Xrcc4	0.473358	0.331404	0.52405		0.379518	0.48427	0.810589		0.500503	0.652048	0.706875		0.534739	0.732038	0.865226
Lig4	0.73929	1.02664	1.74762		0.778603	1.57545	1.44377		0.677573	1.88344	1.5973		0.742126	1.76107	1.53639
Nhej1（Xlf）	1.66309	0.575667	0.699227		1.24474	1.1337	1.3738		1.04006	0.79898	1.35751		1.17084	1.21256	1.39612
Figure 9
Cell cycle and Signal Transduction
Atm	1.9381	1.67676	3.907		1.77204	4.80741	4.65419		2.30649	4.84833	5.31191		2.30869	5.04542	5.20239
Atr	1.24619	0.901804	1.98607		0.887861	2.834	1.93478		1.42529	3.19413	2.51595		1.31788	2.81036	2.19121
Chek1	4.00498	5.25623	5.15405		3.93583	7.83112	4.61031		3.42603	7.19738	4.39136		2.98309	6.49221	3.89118
Chek2	6.88552	5.77761	4.63666		6.70714	6.22938	4.31836		6.02827	4.9424	5.38764		5.81606	4.87725	4.86925
Prkdc (DNAPKcs)	2.08132	1.36563	2.62818		1.99676	3.74403	3.31167		2.56608	3.63499	3.48859		2.41474	3.63918	3.76727
Trp53	37.9605	36.1008	31.8335		36.2345	32.3985	31.1103		35.8536	32.4292	31.8924		37.8088	35.2077	35.2323
Trp53inp1	6.86152	11.6915	18.3173		6.99355	27.9068	21.487		15.3044	38.8386	27.2181		14.4829	38.2978	25.6736
Cdkn1a (p21)	22.4942	43.8425	52.6382		22.8708	45.3029	66.1012		41.7475	64.5992	66.8808		39.3271	71.6818	71.2513
Cdkn2a (p16)	6.92029	4.65637	3.80358		7.48285	4.10627	3.43711		13.7349	4.84138	5.63192		11.2411	4.27479	5.44617
Cdkn1b (p27)	4.78846	7.20108	4.50961		4.66792	5.74451	4.2573		2.69618	4.75593	3.90428		3.03945	4.37747	3.57891
Gadd45a	13.7479	14.6862	6.28056		13.2068	11.7047	6.35733		15.0468	14.5946	8.10037		15.5972	11.9413	6.93701
Pcna	46.5775	64.5129	49.9334		53.5377	69.4006	50.3779		56.5374	65.9428	54.6857		53.252	64.8599	54.797
Mdm2	11.7541	23.5972	23.2063		12.3961	35.4729	24.3151		21.7751	46.2917	30.7872		20.2696	46.5067	30.4391
Ccna2 (CyclinA)	24.6469	23.401	23.6263		24.9132	25.1475	22.5042		24.5346	27.1187	21.7206		23.8225	24.8407	20.787
Ccnb1 (CyclinB)	34.0188	37.8088	33.5009		37.6369	42.6217	34.6113		36.8269	36.8269	31.8591		34.5662	35.7989	30.8202
Ccnd1	24.38	18.6551	11.6708		24.2615	18.192	11.7754		27.1034	16.5874	14.8833		24.8225	16.401	14.5877
Ccne1v(CyclinE)	35.4729	36.5662	16.858		35.0479	30.4391	19.9118		25.0577	22.2347	12.1407		26.43	22.1173	12.9712
Rb1	0.857549	1.21319	0.640693		1.08874	2.00784	1.07328		1.23704	2.26916	1.55466		1.50025	2.51919	1.70943
Apc	2.67606	2.39079	9.37147		2.44829	6.86543	9.92261		2.98511	7.41355	9.63294		3.0469	7.33814	9.1424
Brca1	6.83135	6.61901	8.6864		6.10483	11.6915	9.5993		5.17214	10.8528	9.17642		5.64905	11.2597	9.46584
Brca2	2.34755	1.45352	5.03679		2.22818	6.06315	5.05816		3.60892	7.16611	5.65067		3.5289	7.35226	5.53247
Casp3	6.24095	5.81742	3.70613		7.34605	5.99433	4.00604		6.61172	6.51247	4.87292		6.03226	6.27067	5.18129
Casp9	3.17958	3.78201	2.2069		3.04099	3.04522	2.22308		1.96641	2.39846	2.22308		2.04553	2.47427	2.09437
Bcl2	0.180247	0.117435	0.131316		0.100931	0.0599623	0.0960265		0.113156	0.0504196	0.079192		0.106999	0.104148	0.028398
Bax	41.2471	43.0836	47.8101		39.1608	37.0982	48.0963		47.1628	44.4554	57.1337		50.1263	48.0963	56.5374
Figure 10
																	H2AX (+/+) BU sum 0-8h	H2AX (+/+) ISS sum 0-8h	Ratio ISS/BU sum 0-8h		H2AX (+/+) Fe 0 Gy 0h	H2AX (+/+) Fe 0 Gy 2h	H2AX (+/+) Fe 0 Gy 8h	H2AX (+/+) Fe 0 Gy 24h	H2AX (+/+) Fe 0 Gy 48h		H2AX (+/+) Fe 3 Gy 0h	H2AX (+/+) Fe 3 Gy 2h	H2AX (+/+) Fe 3 Gy 8h	H2AX (+/+) Fe 3 Gy 24h	H2AX (+/+) Fe 3 Gy 48h		H2AX (+/+) Fe 0 Gy sum 0-8h	H2AX (+/+) Fe 3 Gy sum 0-8h	Ratio Fe 3 Gy/0 Gy sum 0-8h	H2AX (+/+) Fe 0 Gy sum 0-48h	H2AX (+/+) Fe 3 Gy sum 0-48h	Ratio Fe 3 Gy/0 Gy sum 0-48h
Trp53	37.9605	36.1008	31.8335		36.2345	32.3985	31.1103		35.8536	32.4292	31.8924		37.8088	35.2077	35.2323		105.895	99.7434	0.94191		31.1546	31.6735	28.651	29.4542	27.1021		31.5971	32.1576	25.9554	31.8965	39.0727		91.4791	89.71	0.980662	148.035	160.679	1.08541
Trp53inp1	6.86152	11.6915	18.3173		6.99355	27.9068	21.487		15.3044	38.8386	27.2181		14.4829	38.2978	25.6736		36.8703	56.3874	1.52934		13.2275	18.2805	15.247	9.14146	13.5403		13.2606	22.5484	26.5005	23.0097	15.3156		46.755	62.3096	1.33268	69.4368	100.635	1.4493
Cdkn1a	22.4942	43.8425	52.6382		22.8708	45.3029	66.1012		41.7475	64.5992	66.8808		39.3271	71.6818	71.2513		118.975	134.275	1.1286		19.5911	34.9501	47.6992	32.2751	30.1367		19.6676	46.5385	64.3101	56.1013	34.0371		102.24	130.516	1.27656	164.652	220.655	1.34012
Mdm2	11.7541	23.5972	23.2063		12.3961	35.4729	24.3151		21.7751	46.2917	30.7872		20.2696	46.5067	30.4391		58.5576	72.184	1.2327		16.6173	27.369	21.9648	13.4534	14.1674		15.9159	32.4484	31.1021	30.9972	16.325		65.9511	79.4664	1.20493	93.572	126.789	1.35498
H2AX-deficient effect
Figure 11
Trp53	37.9605	36.1008	31.8335		36.2345	32.3985	31.1103		35.8536	32.4292	31.8924		37.8088	35.2077	35.2323
Rad51	8.35912	8.29075	5.85791		8.25142	8.59711	6.0734		7.94451	8.02155	5.79544		8.27864	7.9106	5.61331
Xrcc5	21.4488	19.6522	15.9031		22.7344	21.9808	20.7405		25.4022	23.2983	24.2983		23.0289	23.6263	22.035
H2afx	255.369	195.922	184.017		216.391	156.79	159.388		1.54641	0.398785	1.03079		1.5961	0.496335	0.833311
Gm13456	41.6922	41.3232	40.6972		40.5306	40.1209	43.0836		0.791596	0.969385	0.650056		1.02487	1.7654	1.26273
Hist1h2al	318.927	290.046	216.391		266.172	201.143	208.268		7.42738	4.4876	7.84876		7.55139	4.74916	5.56055
Mnd1	10.186	8.96682	6.57597		9.37757	13.3286	6.77589		5.34556	4.51838	3.09021		5.50818	4.76354	2.33671
Mnat1	4.4742	3.8573	3.65289		3.95669	4.39615	3.61402		3.80087	4.10128	3.43711		4.00604	3.63582	3.7808
Hist2h2aa2	47.7488	142.156	35.1769		110.21	80.5779	62.4094		399.998	296.732	309.096		381.105	321.513	295.206
Cdkn1a	22.4942	43.8425	52.6382		22.8708	45.3029	66.1012		41.7475	64.5992	66.8808		39.3271	71.6818	71.2513
Mdm2	11.7541	23.5972	23.2063		12.3961	35.4729	24.3151		21.7751	46.2917	30.7872		20.2696	46.5067	30.4391
Trp53inp1	6.86152	11.6915	18.3173		6.99355	27.9068	21.487		15.3044	38.8386	27.2181		14.4829	38.2978	25.6736
Calcoco2	2.52837	4.00307	5.1331		3.08972	2.70932	5.79254		10.4782	13.9987	37.2598		11.0498	16.439	40.8885
Tbx3	8.1214	13.3433	16.79		7.49201	11.7232	15.1407		29.3287	31.3431	34.9018		30.3013	30.9053	35.6406
Sdc4	9.15085	10.8199	12.1258		9.1444	11.0274	12.4572		26.836	34.6113	27.1187		26.1351	36.7924	30.7279
Htra1	6.75249	3.21723	2.26048		6.0079	2.57164	2.64937		16.4203	8.71284	7.41118		15.4899	8.55842	8.62225
Gjb3	6.28768	4.17032	5.54152		6.11268	3.3343	5.55808		16.858	10.7874	23.4489		15.9493	12.0237	21.5045
Supplemental Figure S1
DNA Replication
Pold1	28.6037	22.0522	18.7403		26.2462	19.2079	16.8449		15.8141	11.7814	12.3426		16.0833	12.9094	13.8145
Pole	11.2461	9.30948	9.04145		11.9633	10.4191	9.40243		10.5956	10.0499	9.67922		10.9442	10.6199	9.63535
Primpol	1.02244	1.08737	0.91076		1.01154	1.17365	1.26584		1.05417	1.19691	1.26439		1.11564	1.25403	0.87026
Rnaseh1	7.41964	8.27633	6.48064		7.42123	6.85767	7.04885		9.01569	7.19032	8.39991		8.89809	8.28037	9.87299
Pcna	46.5775	64.5129	49.9334		53.5377	69.4006	50.3779		56.5374	65.9428	54.6857		53.252	64.8599	54.797
Dna2	9.06347	7.10058	8.0752		9.2815	7.50649	8.97936		10.1391	7.81773	8.83865		9.2815	8.21312	9.49211
Lig1	34.1079	34.459	28.8023		32.6148	35.7989	27.6667		30.3013	32.8962	24.801		33.3956	34.7763	26.7845
Fen1	22.7344	31.9311	25.8448		22.1619	26.5825	20.4241		19.3508	22.5867	19.8358		20.0265	26.1868	18.6084
Rfc1	10.2099	8.93967	15.4677		8.87906	18.7403	15.1809		7.78204	15.7399	14.3539		9.55886	15.506	14.0535
Rfc2	8.75486	6.65147	5.57124		8.44009	6.22002	5.94272		7.50649	6.21411	4.6586		7.69756	6.19028	5.60343
Rfc3	5.67827	6.96526	4.13579		5.62034	5.78321	4.32027		4.40286	5.36828	3.56787		4.53803	5.027	3.40052
Rfc4	11.3529	12.8828	8.36973		12.9245	13.7543	7.5878		12.3529	13.6381	8.56855		12.0497	13.1719	7.75627
Rfc5	15.9694	15.0227	13.9451		16.9511	13.4935	13.7543		15.6163	13.0493	12.6793		16.0544	12.9712	13.4877
Mcm2	73.5862	69.6164	60.3892		71.6818	62.2088	58.4861		58.3328	61.9363	55.0944		60.7606	62.8196	57.6565
Mcm3	58.3328	62.2088	41.1795		58.3328	56.6993	42.8614		48.7472	54.038	42.9649		49.5658	55.9205	42.4554
Mcm3ap	16.0544	11.5778	16.6501		14.2104	10.9561	15.9761		21.7206	19.1658	19.9491		22.7592	19.485	21.673
Mcm4	31.4177	38.4604	28.3234		32.3985	47.891	32.5298		32.5015	46.7752	30.6303		32.3597	46.6685	32.1231
Mcm5	53.7163	62.8196	48.2802		56.0308	56.2378	46.0753		50.463	52.2015	44.8962		52.0771	56.0308	46.9735
Mcm6	37.337	36.7285	25.4433		38.1617	39.7208	26.8088		31.7645	36.1722	26.1055		32.7653	35.8536	24.5763
Mcm7	50.984	52.9592	32.5015		52.9592	46.4136	33.0079		51.1763	50.2265	36.5662		53.374	51.7674	37.4841
Mcm8	4.76417	4.32635	3.55811		3.97334	4.86642	4.94684		4.24055	4.86291	5.08074		3.99782	4.73093	4.63309
Mcm9	1.6426	1.69491	1.87441		1.90912	2.18199	1.5595		2.20735	2.00521	1.96202		2.12506	1.94572	1.67085
Mcm10	12.5841	10.745	10.6097		11.6242	9.444	10.2299		11.2769	10.1695	8.91895		11.8976	10.1265	9.57359
Figure S2
Mismatch Repair
Pms1	1.11743	1.19334	1.68992		0.999568	1.9463	1.90777		1.02526	2.14341	1.73316		1.38788	1.68206	1.693
Pms2	2.45422	3.20603	2.09651		2.32864	3.00875	2.36545		2.57962	2.82082	1.74064		2.52161	2.53383	2.09784
Mlh1	3.28078	2.6752	2.76615		3.83186	2.39079	2.77615		3.68196	3.49203	3.44937		3.79088	2.92563	2.96251
Mlh3	2.65839	1.8284	5.83176		2.82595	3.96435	5.65675		2.88244	4.23638	5.7426		3.65643	3.92865	6.25802
Msh2	20.7539	19.4698	17.2333		22.1901	20.8516	19.9696		23.2983	23.5972	21.5341		23.8376	23.4591	21.1994
Msh3	1.64603	2.27947	2.53661		2.10658	3.0469	2.29031		1.67216	2.7409	2.38075		1.6878	3.01851	2.37818
Msh4	0.0991442	0.0759327	0.157956		0.131283	0.129329	0.135715		0.0924524	0.172203	0.078825		0.0870221	0.165881	0.161539
Msh5	0.13602	0.145382	0.199328		0.175816	0.235537	0.214714		0.204977	0.153227	0.169559		0.183316	0.111025	0.329738
Msh6	74.3094	64.9972	67.4998		72.2088	89.6991	74.0339		70.2641	93.2825	77.6545		75.7293	90.9559	76.0775
Exo1	5.08716	6.03391	5.91327		5.33186	5.90935	5.96048		5.63756	6.26719	4.84262		5.19268	5.97252	4.82708
Lig1	34.1079	34.459	28.8023		32.6148	35.7989	27.6667		30.3013	32.8962	24.801		33.3956	34.7763	26.7845
Pold1	28.6037	22.0522	18.7403		26.2462	19.2079	16.8449		15.8141	11.7814	12.3426		16.0833	12.9094	13.8145
Pold2	36.0077	28.4202	17.7062		29.6287	19.485	14.5582		19.522	15.3864	12.6664		21.589	17.1714	13.3943
Pold3	13.799	13.023	9.99406		12.6268	13.2194	11.0036		8.83865	9.45919	8.62865		8.59711	9.40452	8.11705
Pold4	4.26647	2.47321	1.24234		3.5296	1.87835	0.85332		3.43614	2.06923	1.28179		3.22093	2.31131	1.19799
Figure S3
Base Excision Repair
Ogg1	3.43556	3.18064	2.31715		3.11515	2.56469	2.70117		3.97994	3.13951	2.86156		3.56062	3.09494	3.14146
Nthl1	8.45785	6.05761	3.98252		7.4624	4.77888	2.46553		5.47482	5.44353	3.39541		6.9899	5.40864	3.80087
Neil1	1.64833	1.85986	0.984019		2.02285	1.17445	0.975004		1.89324	1.08217	1.03878		1.89443	1.32487	0.926431
Ung	20.5204	23.5681	10.5659		18.5681	20.0265	9.27886		17.0697	21.5045	13.7889		18.4225	21.2562	12.9128
Mutyh	5.22842	4.1185	3.25956		4.9424	3.24396	3.17231		4.2979	2.76482	3.06358		3.74545	2.94223	3.15359
Mbd4	2.35957	2.99934	2.59692		2.74662	3.32396	2.61217		2.09694	3.61626	2.74157		2.51875	2.96316	2.78465
Smug1	2.23981	1.62473	1.32527		1.96261	1.49695	1.38567		1.82334	1.55176	1.74297		1.39492	1.67216	1.82893
Mpg	3.59042	2.96526	2.78541		3.2848	2.03397	1.84862		2.81489	1.67085	1.71745		3.26539	1.96552	1.82334
Tdg	12.4105	13.5504	11.1803		13.1327	11.835	10.3144		11.695	11.4411	8.99596		10.7377	10.6124	10.0708
Apex1	45.1365	41.1126	31.6071		44.8962	36.3243	33.24		48.4442	37.1653	36.2759		48.4442	37.5341	32.9911
Pnkp	5.25247	4.60279	4.0938		5.09242	3.12767	3.55427		5.43611	3.32051	4.67072		5.214	3.80631	3.95481
Tdp1	4.89388	5.11005	3.15958		4.95688	3.74016	3.54549		5.25623	4.39615	3.8491		4.77316	4.30008	3.23477
Parp1	64.9972	52.5061	45.1005		60.6463	51.0808	45.765		59.7386	54.3559	47.7488		62.6624	55.0944	50.1263
Parp2	10.2299	11.3729	11.2336		10.6676	11.4717	11.745		10.1695	11.3959	8.94802		11.0754	10.8474	8.1813
Xrcc1	8.03236	7.05649	7.31405		7.65766	5.58528	6.5988		6.35733	6.07671	6.74796		7.04431	5.63046	7.78549
Polb	2.15837	3.32504	2.92171		2.5129	3.74624	3.17958		2.92563	3.91167	2.94522		2.52705	3.31549	2.56775
Lig3	7.82798	5.58528	6.57336		7.85518	5.4979	7.77501		6.77589	5.2958	6.13891		6.985	5.51562	6.69986
Pold1	28.6037	22.0522	18.7403		26.2462	19.2079	16.8449		15.8141	11.7814	12.3426		16.0833	12.9094	13.8145
Pole	11.2461	9.30948	9.04145		11.9633	10.4191	9.40243		10.5956	10.0499	9.67922		10.9442	10.6199	9.63535
Pcna	46.5775	64.5129	49.9334		53.5377	69.4006	50.3779		56.5374	65.9428	54.6857		53.252	64.8599	54.797
Fen1	22.7344	31.9311	25.8448		22.1619	26.5825	20.4241		19.3508	22.5867	19.8358		20.0265	26.1868	18.6084
Lig1	34.1079	34.459	28.8023		32.6148	35.7989	27.6667		30.3013	32.8962	24.801		33.3956	34.7763	26.7845
Figure S4
Nucleotide Excision Repair
Rbx1	21.589	21.1141	15.4365		19.8513	19.6279	17.1215		20.3338	20.5567	16.8519		19.6279	18.0568	13.8278
Cul4a	6.51934	4.99329	6.10021		6.32383	4.74225	5.8896		6.005	4.42897	6.08189		5.47654	4.56283	5.7583
Cul4b	14.5829	13.9941	35.5779		15.0741	32.0156	35.4217		17.9286	36.0077	42.6217		17.9535	35.5122	36.8757
Ddb1	110.847	94.698	106.81		109.59	98.6264	110.21		128.448	113.912	128.448		124.745	127.248	128.448
Ercc1	5.88163	5.01093	5.09242		4.79649	3.75754	3.9782		6.61328	4.2894	4.58892		6.29395	4.54914	4.47146
Ercc2	7.62911	7.91457	8.81784		7.55139	6.75748	7.36633		7.16061	6.75646	7.65617		7.58442	7.30849	7.27983
Ercc3	12.335	9.69406	11.9734		11.6162	9.71767	12.3248		12.781	10.9831	11.8814		13.1619	11.2945	11.3198
Ercc4	3.27005	1.66516	3.01488		2.40416	1.90496	2.88675		3.03945	2.83882	3.99682		2.91937	2.43768	3.94893
Ercc5	3.6219	3.25636	4.20034		3.50871	4.87828	4.60496		5.39559	6.27929	5.16413		5.0445	6.4966	5.34556
Ercc6	2.25254	2.81375	3.14994		2.18901	3.27083	3.32802		1.76918	3.09021	2.89969		2.35705	2.79701	3.08461
Xpa	1.24739	1.48059	1.94743		1.29831	1.12151	1.92937		1.42368	1.53404	1.20417		1.40409	0.781342	1.74679
Xpc	3.81969	2.98224	2.21288		3.4697	2.62945	2.83306		3.4559	2.63217	2.93775		3.22139	2.55629	2.95447
Rad23a	16.6069	11.5363	10.7377		16.79	11.1195	8.79037		14.0856	10.9605	10.6965		13.8907	9.34727	10.9142
Rad23b	29.5012	29.234	27.0753		28.2828	27.7537	25.4277		31.0528	29.1442	27.6667		30.2097	30.1121	27.1643
Cetn2	4.08235	4.27631	3.0536		4.51953	5.47741	2.63413		5.0152	4.28696	3.37724		4.48112	4.23033	2.66379
Cetn3	10.8288	12.2928	14.1515		12.5751	18.2791	13.9218		13.6197	15.1809	12.3529		12.7464	14.1868	10.5111
Hspa9	64.0221	77.1314	85.4327		67.9217	106.81	85.7255		62.8196	92.8446	81.3061		62.9554	91.6175	74.0339
Polr2a	51.509	36.6385	47.1628		53.647	37.6989	48.8836		56.9226	46.5775	51.509		58.7782	47.9785	54.5161
Uvssa	0.56194	0.462436	1.31937		0.589955	0.618776	1.0523		0.708495	0.633478	1.07024		0.796127	0.806545	1.07597
Cdk7	3.87884	3.83054	4.4958		4.22716	5.01439	4.50512		4.87484	5.05409	4.95615		4.98082	4.80741	5.06833
Mnat1	4.4742	3.8573	3.65289		3.95669	4.39615	3.61402		3.80087	4.10128	3.43711		4.00604	3.63582	3.7808
Ccnh	4.21999	4.91376	3.38581		4.4742	4.30104	3.93093		4.60415	4.43014	4.00696		4.50961	4.71101	3.27178
Figure S5
Mitochondrial Genes
mt-Nd1	212.778	259.27	534.429		284.656	589.301	617.723		544.553	617.723	779.597		435.053	544.553	732.952
mt-Nd2	86.0002	125.902	290.046		105.769	357.94	341.367		174.847	250.031	390.42		158.444	246.864	368.442
mt-Nd3	72.9496	124.154	136.552		99.2865	156.195	138.359		206.901	157.632	205.236		162.112	100.282	181.876
mt-Nd4	135.173	166.243	390.42		164.621	428.382	467.259		295.206	372.425	552.705		239.005	334.729	489.867
mt-Nd4l	106.81	118.073	299.719		135.629	321.513	368.442		256.952	321.513	482.301		202.681	278.241	421.464
mt-Nd5	202.681	212.778	501.734		256.952	489.867	521.544		384.704	387.501	617.723		309.096	368.442	565.55
mt-Nd6	118.557	122.345	284.656		142.156	239.005	292.683		202.681	140.51	295.206		155.436	148.194	324.58
mt-Rnr1	4631.57	4631.57	4631.57		4631.57	4631.57	4631.57		4631.57	5975.4	5975.4		4631.57	4631.57	4631.57
mt-Rnr2	5975.4	5975.4	13955		5975.4	17870.5	13955		9709.5	17870.5	16284.8		7912.61	9709.5	13955
mt-Ta	11.9372	20.5204	17.6321		20.4666	11.7182	25.754		19.8199	25.1215	17.8385		14.7075	20.8959	27.1187
mt-Tc	2.49024	7.68499	11.4953		7.63838	13.2129	3.16353		12.1674	11.7991	16.3263		15.2745	11.2676	12.6005
mt-Td	0	0	0		0	0	0		0	0	0		0	0	0
mt-Te	0	2.98137	1.3768		5.27877	6.37635	8.6809		2.70932	5.9928	7.32312		4.97567	2.34152	8.48113
mt-Tf	1.23795	2.11094	1.40152		0	1.93268	0.959093		3.69055	4.53305	4.05059		0	0.834191	2.97761
mt-Tg	0	0	0		2.22228	0	0		0	0	0		0	0	0
mt-Th	3.65289	9.29665	4.54063		5.45657	3.81007	17.6321		14.6499	11.6104	13.4539		11.7697	5.56562	12.376
mt-Ti	0	1.07633	1.3772		0	3.69834	0		0	1.55466	0		0.810184	1.58345	1.90347
mt-Tk	0	0	0		0	0	0		0	0	0		0	0	0
mt-Tl1	1.12445	0	5.41224		0	6.69489	3.73469		5.78399	9.6682	3.62819		4.5832	3.56982	5.6115
mt-Tl2	11.5944	16.2706	23.9543		12.6474	18.5849	28.7498		17.8598	7.98953	8.23159		11.1195	15.0798	20.6679
mt-Tm	0	2.08219	0		0	0.96766	0		1.76382	0.811971	1.91602		0.810589	3.09021	1.90438
mt-Tn	3.4559	1.04573	2.77377		1.08325	1.84552	2.92563		5.27767	3.67272	11.6212		4.84833	5.98596	3.85376
mt-Tp	35.2323	47.4156	14.461		46.2917	43.3678	17.6459		45.6693	34.365	41.5977		34.1471	25.0857	23.2866
mt-Tq	0	2.02146	4.23916		1.08351	4.46432	1.90558		3.52317	5.12918	4.90835		4.84988	1.53639	4.93045
mt-Tr	0	0	0		0	0	0		0	0.824175	0		0	0	0
mt-Ts1	0	1.0767	0		0	0	0		0	0	0		0	0	0.930492
mt-Ts2	6.72709	8.50136	3.3574		7.33031	8.39077	14.5073		6.32939	11.4185	25.2068		7.74264	9.80557	14.008
mt-Tt	11.1942	10.1414	1.42308		3.34705	7.41118	0.971684		6.49904	6.95833	8.76089		9.30948	5.56655	4.10627
mt-Tv	0	0	0		0	0.967861	0		0	0.812214	0		1.6426	0	0.930662
mt-Tw	0	2.14341	0		1.14877	0	3.1102		1.82256	3.88863	0		0.833311	0	0
mt-Ty	36.9601	35.2323	37.0533		52.6382	36.5109	46.1463		78.4545	68.1917	75.2975		54.9346	51.9764	59.443
mt-Atp6	368.442	394.212	883.87		472.674	1006.39	1006.39		883.87	1006.39	1116.9		675.336	1006.39	1006.39
mt-Atp8	137.695	138.359	295.206		189.613	435.053	354.339		296.732	299.719	399.998		269.331	241.552	390.42
mt-Co1	1249.62	1116.9	1647.35		1403.32	1647.35	1647.35		1647.35	1647.35	1647.35		1647.35	1647.35	1647.35
mt-Co2	617.723	583.278	1249.62		752.774	1249.62	1249.62		1116.9	1249.62	1403.32		1116.9	1249.62	1403.32
mt-Co3	779.597	883.87	1116.9		1249.62	1116.9	1116.9		1403.32	1116.9	1249.62		1249.62	1116.9	1249.62
mt-Cytb	194.766	232.934	589.301		255.369	617.723	646.401		455.933	552.705	752.774		384.704	521.544	752.774
