# Supplementary material for: Transcriptome Analysis by RNA Sequencing of Mouse Embryonic Stem Cells Stocked on International Space Station for 1584 Days in Frozen State after Culture on the Ground
Source: Int J Mol Sci. 2024 Mar 14;25(6):3283. doi: 10.3390/ijms25063283 (PMC10970647; doi:10.3390/ijms25063283)
Supplement: Supplementary file 1 [file ijms-25-03283-s001.zip › Morita Supplementary Excel data-S2.xlsx]

## Sheet: Sheet1
Feature ID	0h - OSC_002_01 (GE) - Normalized expression values	2h - OSC_002_03 (GE) - Normalized expression values	8h - OSC_002_05 (GE) - Normalized expression values	24h - OSC_002_07 (GE) - Normalized expression values	48h - OSC_002_09 (GE) - Normalized expression values		0h_3Gy - OSC_002_02 (GE) - Normalized expression values	2h_3Gy - OSC_002_04 (GE) - Normalized expression values	8h_3Gy - OSC_002_06 (GE) - Normalized expression values	24h_3Gy - OSC_002_08 (GE) - Normalized expression values	48h_3Gy - OSC_002_10 (GE) - Normalized expression values
	'H2AX (+/+) Fe 0 Gy 0h	'H2AX (+/+) Fe 0 Gy 2h	'H2AX (+/+) Fe 0 Gy 8h	'H2AX (+/+) Fe 0 Gy 24h	'H2AX (+/+) Fe 0 Gy 48h		'H2AX (+/+) Fe 3 Gy 0h	'H2AX (+/+) Fe 3 Gy 2h	'H2AX (+/+) Fe 3 Gy 8h	'H2AX (+/+) Fe 3 Gy 24h	'H2AX (+/+) Fe 3 Gy 48h
mt-Atp6	1379.34	1379.34	1477.71	1379.34	1152.36		1634.31	1379.34	1477.71	1379.34	1379.34
mt-Atp8	446.269	403.575	446.269	536.278	416.294		563.312	289.142	481.096	585.577	605.385
mt-Co1	3067.83	3067.83	2127.3	3067.83	2127.3		3067.83	2127.3	2127.3	2127.3	2127.3
mt-Co2	1634.31	1634.31	1634.31	1634.31	1634.31		2127.3	1477.71	1634.31	1634.31	1634.31
mt-Co3	1477.71	1477.71	1379.34	1477.71	1477.71		1477.71	895.107	1379.34	1477.71	1477.71
mt-Cytb	670.446	605.385	729.808	895.107	585.577		702.729	510.693	833.775	895.107	833.775
mt-Nd1	702.729	670.446	833.775	833.775	702.729		729.808	554.646	895.107	1152.36	895.107
mt-Nd2	353.382	385.139	368.516	510.693	353.382		385.139	299.041	419.889	481.096	494.146
mt-Nd3	119.135	160.583	123.063	178.282	91.0775		135.212	99.7098	156.486	188.449	176.036
mt-Nd4	394.87	368.516	385.139	585.577	305.749		394.87	245.901	439.857	536.278	510.693
mt-Nd4l	403.575	348.314	419.889	605.385	348.314		435.62	280.238	456.791	729.808	702.729
mt-Nd5	385.139	316.179	435.62	729.808	439.857		403.575	239.38	435.62	702.729	670.446
mt-Nd6	165.197	136.895	217.4	379.438	257.806		166.621	134.518	242.396	360.512	289.142
mt-Rnr1	8545.67	8545.67	5470.11	8545.67	8545.67		8545.67	4367.46	5470.11	6717.69	6717.69
mt-Rnr2	17982.2	17982.2	17982.2	14890.7	14890.7		17982.2	11791.6	17982.2	14890.7	17982.2
mt-Ta	18.9446	16.0936	16.106	14.2866	25.2106		14.8604	8.69718	17.1479	22.6198	22.7326
mt-Tc	18.2436	18.3256	13.8533	11.0658	13.0102		12.1803	16.7828	19.0253	17.3799	19.8389
mt-Td	0	0	0	0	0		0	0	0	0	0
mt-Te	1.47513	5.07311	0	9.42707	1.81643		2.89381	3.1766	2.62302	5.94303	3.65027
mt-Tf	0	1.86884	0.858661	1.07404	0		0	0	0.858342	3.50739	0
mt-Tg	0	0	0	0	0		0	0	0	0	0
mt-Th	3.05286	3.59223	4.47215	14.8104	7.25057		5.12051	6.80002	9.52304	7.50288	14.1753
mt-Ti	0.746768	3.50217	3.42378	2.17791	3.86208		0.743378	2.45041	2.62335	2.20034	1.18442
mt-Tk	0	0	0	0	0		0	0	0	0	0
mt-Tl1	3.39165	4.66632	1.57503	1.99483	2.54452		5.83534	2.95323	5.83206	0.947331	2.2135
mt-Tl2	12.4533	10.319	12.0704	21.9017	22.3684		17.0017	6.47822	10.8528	22.1293	14.6083
mt-Tm	1.47566	1.84442	3.42431	2.1788	0.882841		1.48121	0.89583	0.847008	1.0339	0
mt-Tn	1.43115	3.41741	5.0708	6.75292	1.76686		8.78923	4.45253	5.25971	10.8073	9.72874
mt-Tp	39.8713	42.7704	25.6622	38.0792	38.3958		27.6893	30.2582	25.7274	36.1176	37.2458
mt-Tq	1.43148	6.47563	7.65307	7.89815	10.9371		1.44033	7.14657	5.26101	3.34077	14.6161
mt-Tr	0	0.990268	0	0	0		0.756433	1.7246	0.858661	0	0
mt-Ts1	0	0	0	0	0.88311		0	0	0	0	0
mt-Ts2	5.95965	8.56821	12.4103	9.6528	20.6078		11.2384	6.1056	3.08809	2.62588	13.0651
mt-Tt	4.51717	5.23699	1.75339	5.83671	7.25278		5.12142	8.22073	4.61156	4.83061	7.67893
mt-Tv	1.47596	0.972414	0	0	0		2.18964	0	0	0	0
mt-Tw	0.766838	1.00469	1.75377	2.24939	0.905917		0	0	0	0	1.22497
mt-Ty	62.7195	69.3028	53.7979	63.8717	65.4834		70.1522	44.5845	66.9017	70.3617	72.4931

## Sheet: Figure 4
Feature ID	0h - OSC_002_01 (GE) - Normalized expression values	2h - OSC_002_03 (GE) - Normalized expression values	8h - OSC_002_05 (GE) - Normalized expression values	24h - OSC_002_07 (GE) - Normalized expression values	48h - OSC_002_09 (GE) - Normalized expression values		0h_3Gy - OSC_002_02 (GE) - Normalized expression values	2h_3Gy - OSC_002_04 (GE) - Normalized expression values	8h_3Gy - OSC_002_06 (GE) - Normalized expression values	24h_3Gy - OSC_002_08 (GE) - Normalized expression values	48h_3Gy - OSC_002_10 (GE) - Normalized expression values
	H2AX (+/+) Fe 0 Gy 0h	H2AX (+/+) Fe 0 Gy 2h	H2AX (+/+) Fe 0 Gy 8h	H2AX (+/+) Fe 0 Gy 24h	H2AX (+/+) Fe 0 Gy 48h		H2AX (+/+) Fe 3 Gy 0h	H2AX (+/+) Fe 3 Gy 2h	H2AX (+/+) Fe 3 Gy 8h	H2AX (+/+) Fe 3 Gy 24h	H2AX (+/+) Fe 3 Gy 48h
Ifit2	0.733123	0.662196	8.01657	0.566681	0.105761		0.681068	0.358612	10.2692	0.90304	0.224399
Ifit3	2.99383	1.65413	24.4885	6.4935	0.386728		3.3388	0.686324	31.6332	8.81227	2.09261
Acta2	24.7626	15.6319	24.5447	27.6353	3.53468		22.7797	8.48783	21.1671	58.1955	27.369
Timp2	20.3213	13.0505	24.3959	24.6085	5.79588		20.1334	7.97536	30.8769	49.6589	15.6486
Timp3	3.80608	2.25701	6.98959	7.74312	2.21975		4.02609	1.95805	8.1546	17.9212	6.97708
Sdc4	8.24204	13.0057	15.4167	21.9308	47.1452		8.1784	14.7882	24.9474	65.1214	34.2366
Col1a2	25.4588	12.3664	22.2822	38.2532	31.4722		25.2882	8.48988	27.1799	78.9254	41.5674
Col3a1	26.2213	11.5873	21.4599	35.7122	35.0759		24.5279	8.00593	25.2882	85.2124	38.0318
Col5a1	16.501	10.2075	17.8731	28.9029	16.3053		15.8182	7.50461	19.5165	63.5077	26.6202
Lox	14.1456	7.36858	22.0536	26.3551	26.8732		15.0343	4.60389	26.0968	44.3703	37.6346

## Sheet: Figure 5
	0h - OSC_002_01 (GE) - Normalized expression values	2h - OSC_002_03 (GE) - Normalized expression values	8h - OSC_002_05 (GE) - Normalized expression values	24h - OSC_002_07 (GE) - Normalized expression values	48h - OSC_002_09 (GE) - Normalized expression values		0h_3Gy - OSC_002_02 (GE) - Normalized expression values	2h_3Gy - OSC_002_04 (GE) - Normalized expression values	8h_3Gy - OSC_002_06 (GE) - Normalized expression values	24h_3Gy - OSC_002_08 (GE) - Normalized expression values	48h_3Gy - OSC_002_10 (GE) - Normalized expression values
	H2AX (+/+) Fe 0 Gy 0h	H2AX (+/+) Fe 0 Gy 2h	H2AX (+/+) Fe 0 Gy 8h	H2AX (+/+) Fe 0 Gy 24h	H2AX (+/+) Fe 0 Gy 48h		H2AX (+/+) Fe 3 Gy 0h	H2AX (+/+) Fe 3 Gy 2h	H2AX (+/+) Fe 3 Gy 8h	H2AX (+/+) Fe 3 Gy 24h	H2AX (+/+) Fe 3 Gy 48h
Krt8	5.61961	8.68591	18.6731	4.45819	1.29457		5.85408	9.94187	19.9702	5.52355	3.49129
Krt18	7.71592	10.7519	14.0969	4.66844	2.6		7.59775	9.845	13.4988	4.37696	2.4768
Actc1	0.410289	0.560135	2.10063	0.0984144	0.125187		0.378838	0.397765	1.50267	0.0474205	0.247129
Tnnt1	1.18442	2.09493	1.58076	0.753989	0.962006		1.43902	1.56217	1.17812	0.466959	0.364914
Tubb5	242.396	211.595	204.922	245.901	208.267		245.901	191.562	239.38	224.269	224.269
Cdx2	0.104217	0.496203	0.538929	0.608599	0		0.0799998	0.770369	0.278746	0.715127	0.284645
Nanog	49.2409	35.2647	56.6687	83.0619	105.1		49.8041	31.2582	52.8766	68.8158	107.207
Pou5f1	118.342	100.225	83.0619	93.7943	90.6127		120.983	108.486	90.0596	86.6476	113.349
Gdf3	10.9461	9.68378	12.3767	19.7089	16.084		11.6017	8.80159	12.0526	18.6442	14.7882
Gja1	36.3047	23.49	39.9096	26.1183	11.0435		33.4588	21.3174	44.8938	37.8475	16.7466
Nifk	14.2866	14.4663	11.3192	8.41294	7.14883		16.5805	15.5543	10.6291	9.06337	10.5693
